# Supplementary material for: Assessment of anxiety and depression in patients with Posner-Schlossman syndrome
Source: Springer Nature journal article supplement (doi:10.1186/s12886-023-03047-4), 2023-06-23
Supplement: MOESM1 [file 25530390]

## Supplementary

Supplementary Table 1. An extract of the Hospital Anxiety and Depression Scale.

| Question No. | Question                                                                     | Rating                              |                                           |                                          |                                      | Anxiety or Depression |
|--------------|------------------------------------------------------------------------------|-------------------------------------|-------------------------------------------|------------------------------------------|--------------------------------------|-----------------------|
| 1            | I feel tense or 'wound up':                                                  | Most of the time (3)                | A lot of the time (2)                     | From time to time, occasionally (1)      | Not at all (0)                       | Anxiety               |
| 2            | I still enjoy the things I used to enjoy:                                    | Definitely as much (0)              | Not quite so much (1)                     | Only a little (2)                        | Hardly at all (3)                    | Depression            |
| 3            | I get a sort of frightened feeling as if something awful is about to happen: | Very definitely and quite badly (3) | Yes, but not too badly (2)                | A little, but it doesn't worry me (1)    | Not at all (0)                       | Anxiety               |
| 4            | I can laugh and see the funny side of things:                                | As much as I always could (0)       | Not quite so much now (1)                 | Definitely not so much now (2)           | Not at all (3)                       | Depression            |
| 5            | Worrying thoughts go through my mind:                                        | A great deal of the time (3)        | A lot of the time (2)                     | From time to time, but not too often (1) | Only occasionally (0)                | Anxiety               |
| 6            | I feel cheerful:                                                             | Not at all (3)                      | Not often (2)                             | Sometimes (1)                            | Most of the time (0)                 | Depression            |
| 7            | I can sit at ease and feel relaxed:                                          | Definitely (0)                      | Usually (1)                               | Not Often (2)                            | Not at all (3)                       | Anxiety               |
| 8            | I feel as if I am slowed down:                                               | Nearly all the time (3)             | Very often (2)                            | Sometimes (1)                            | Not at all (0)                       | Depression            |
| 9            | I get a sort of frightened feeling like 'butterflies' in the stomach:        | Not at all (0)                      | Occasionally (1)                          | Quite Often (2)                          | Very Often (3)                       | Anxiety               |
| 10           | I have lost interest in my appearance:                                       | Definitely (3)                      | I don't take as much care as I should (2) | I may not take quite as much care (1)    | I take just as much care as ever (0) | Depression            |
| 11           | .....                                                                        |                                     |                                           |                                          |                                      |                       |

Sample copy, do not use without permission.

Supplementary Table 2. An extract of the Vision function questionnaire.

| Question No. | Question (with glasses if you wear them)                                                                                                                 | Rating     |          |             |       |
|--------------|----------------------------------------------------------------------------------------------------------------------------------------------------------|------------|----------|-------------|-------|
|              |                                                                                                                                                          | Not at all | A little | Quite a lot | A lot |
| 1            | To what extent does your sight limit you in your daily activities?                                                                                       | 1          | 2        | 3           | 4     |
| 2            | How much problem do you have recognizing people across the street?                                                                                       | 1          | 2        | 3           | 4     |
| 3            | How much problem do you have recognizing the face of a person standing near you?                                                                         | 1          | 2        | 3           | 4     |
| 4            | How much problem do you have recognizing small or minute objects (such as grains or the lines in your hand)?                                             | 1          | 2        | 3           | 4     |
| 5            | When you are walking along, how much problem do you have noticing objects of the side?                                                                   | 1          | 2        | 3           | 4     |
| 6            | How much problem do you have adjusting to darkness after being in bright light?                                                                          | 1          | 2        | 3           | 4     |
| 7            | How much problem do you have adjusting to brightness after being in a dark place?                                                                        | 1          | 2        | 3           | 4     |
| 8            | How much problem do you have locating something when it is surrounded by a lot of other things (like finding a specific food item on your plate)?        | 1          | 2        | 3           | 4     |
| 9            | How much problem do you have in recognizing colors?                                                                                                      | 1          | 2        | 3           | 4     |
| 10           | When you reach for an object (e.g., to take a glass), how much problem do you have in finding it, because it is further away or closer than you thought? | 1          | 2        | 3           | 4     |
| 11           | .....                                                                                                                                                    |            |          |             |       |

Sample copy, do not use without permission.

Supplementary Table 3. An extract of the Quality of life questionnaire.

| Activity                                                                                       | Rating     |          |             |       |
|------------------------------------------------------------------------------------------------|------------|----------|-------------|-------|
|                                                                                                | Not at all | A little | Quite a bit | A lot |
| <b>Self-care</b>                                                                               |            |          |             |       |
| How much problem do you have because of your vision in doing the following activities unaided? |            |          |             |       |
| Bathing                                                                                        | 1          | 2        | 3           | 4     |
| Eating                                                                                         | 1          | 2        | 3           | 4     |
| Dressing                                                                                       | 1          | 2        | 3           | 4     |
| Toileting                                                                                      | 1          | 2        | 3           | 4     |
| <b>Mobility</b>                                                                                |            |          |             |       |
| How much problem do you have because of your vision in doing the following activities unaided? |            |          |             |       |
| Walking to neighbors                                                                           | 1          | 2        | 3           | 4     |
| Walking to shops                                                                               | 1          | 2        | 3           | 4     |
| Doing your usual household chores                                                              | 1          | 2        | 3           | 4     |
| <b>Social</b>                                                                                  |            |          |             |       |
| Because of your visual problems, do you feel less inclined to participate in the following?    |            |          |             |       |
| Attending social functions like weddings, funerals, festivals                                  | 1          | 2        | 3           | 4     |
| Meeting with friends and relatives                                                             | 1          | 2        | 3           | 4     |
| <b>Mental</b>                                                                                  |            |          |             |       |
| .....                                                                                          |            |          |             |       |

Sample copy, do not use without permission.
